# Supplementary material for: Intermittent operation of UASB reactors treating wastewater polluted with organic solvents: process performance and microbial community evaluation
Source: Royal Society of Chemistry journal article supplement (doi:10.1039/c9ew00195f), 2019-01-01

### Supplementary material

**Table S1.** Macro- and micro-nutrients supplementation.

| Macro-nutrients                                          | mg g COD <sup>-1</sup>    | Micro-nutrients                                                                    | mg g COD <sup>-1</sup> |
|----------------------------------------------------------|---------------------------|------------------------------------------------------------------------------------|------------------------|
| NH <sub>4</sub> Cl                                       | 15.3                      | FeCl <sub>3</sub> ·6H <sub>2</sub> O                                               | 0.42                   |
| (NH <sub>4</sub> ) <sub>2</sub> HPO <sub>4</sub>         | 9.5                       | H <sub>3</sub> BO <sub>3</sub>                                                     | 0.11                   |
| KCl                                                      | 3.8                       | ZnSO <sub>4</sub> ·7H <sub>2</sub> O                                               | 0.01                   |
| Yeast extract                                            | 7.5                       | CuCl <sub>2</sub> ·2H <sub>2</sub> O                                               | 0.01                   |
| Alkaline-earth Metals                                    |                           | MnCl <sub>2</sub> ·4H <sub>2</sub> O                                               | 0.14                   |
| Mg <sup>+2</sup> as MgCl <sub>2</sub> ·6H <sub>2</sub> O | 40 mg Mg L <sup>-1</sup>  | (NH <sub>4</sub> ) <sub>6</sub> Mo <sub>7</sub> O <sub>24</sub> ·4H <sub>2</sub> O | 0.06                   |
| Ca <sup>+2</sup> as CaCl <sub>2</sub> ·2H <sub>2</sub> O | 100 mg Ca L <sup>-1</sup> | Al <sub>2</sub> O <sub>3</sub>                                                     | 0.06                   |
|                                                          |                           | CoCl <sub>2</sub> ·6H <sub>2</sub> O                                               | 0.16                   |
|                                                          |                           | NiSO <sub>4</sub> ·6H <sub>2</sub> O                                               | 0.04                   |
|                                                          |                           | EDTANa <sub>2</sub>                                                                | 0.1                    |

**Table S2.** One-way ANOVA analysis including Tukey's test for the methane production of reactors R1, R2 and R3 during phase I.

*Overall results of one-way ANOVA*

|       | DF | Sum of Squares | Mean Square | F Value | p-value |
|-------|----|----------------|-------------|---------|---------|
| Model | 2  | 259,98615      | 129,99308   | 5,26808 | 0,01034 |
| Error | 33 | 814,29519      | 24,67561    |         |         |
| Total | 35 | 1074,28135     |             |         |         |

Null Hypothesis: the means of all levels are equal.

Alternative Hypothesis: The mean of one or more levels are different.

**At the 0.05 level, the population means are significantly different.**

*Results of Tukey's post hoc test*

|       | MeanDiff | SEM     | q Value | Prob    | Alpha | Sig | LCL      | UCL      |
|-------|----------|---------|---------|---------|-------|-----|----------|----------|
| R2 R1 | 6,01844  | 2,02796 | 4,19702 | 0,01493 | 0,05  | 1   | 1,04232  | 10,99456 |
| R3 R1 | 5,31834  | 2,02796 | 3,7088  | 0,03413 | 0,05  | 1   | 3,42E-01 | 10,29447 |
| R3 R2 | -0,7001  | 2,02796 | 0,48822 | 0,93654 | 0,05  | 0   | -5,67622 | 4,27603  |

Sig equals 1 indicates that the difference of the means is significant at the 0.05 level.

Sig equals 0 indicates that the difference of the means is not significant at the 0.05 level.

**Table S3.** One-way ANOVA analysis for the methane production of reactors R1, R2 and R3 during phase II and III.

*Overall results of one-way ANOVA during phase II*

|       | DF | Sum of Squares | Mean Square | F Value | p-value |
|-------|----|----------------|-------------|---------|---------|
| Model | 2  | 91,77927       | 45,88963    | 1,98827 | 0,15169 |
| Error | 36 | 830,8885       | 23,08024    |         |         |
| Total | 38 | 922,66777      |             |         |         |

Null Hypothesis: the means of all levels are equal.

Alternative Hypothesis: The mean of one or more levels are different.

**At the 0.05 level, the population means are not significantly different.**

*Overall results of one-way ANOVA during phase III*

|       | DF | Sum of Squares | Mean Square | F Value | p-value |
|-------|----|----------------|-------------|---------|---------|
| Model | 2  | 106,52227      | 53,26113    | 2,28189 | 0,12296 |
| Error | 25 | 583,52121      | 23,34085    |         |         |
| Total | 27 | 690,04348      |             |         |         |

Null Hypothesis: the means of all levels are equal.

Alternative Hypothesis: The mean of one or more levels are different.

**At the 0.05 level, the population means are not significantly different.**

**Table S4.** One-way ANOVA analysis including Tukey's test for the methane production of reactors R1, R2 and R3 during phase IV.

*Overall results of one-way ANOVA*

|       | DF | Sum of Squares | Mean Square | F Value  | p-value     |
|-------|----|----------------|-------------|----------|-------------|
| Model | 2  | 6000,69041     | 3000,34521  | 73,82613 | 8,13793E-14 |
| Error | 38 | 1544,34633     | 40,64069    |          |             |
| Total | 40 | 7545,03674     |             |          |             |

Null Hypothesis: the means of all levels are equal.

Alternative Hypothesis: The mean of one or more levels are different.

**At the 0.05 level, the population means are significantly different.**

*Results of Tukey's post hoc test*

|       | MeanDiff | SEM     | q Value  | Prob    | Alpha | Sig | LCL       | UCL      |
|-------|----------|---------|----------|---------|-------|-----|-----------|----------|
| R2 R1 | 29,71869 | 2,49693 | 16,83211 | 0       | 0,05  | 1   | 23,6292   | 35,80818 |
| R3 R1 | 22,75061 | 2,56856 | 12,52616 | 0       | 0,05  | 1   | 16,48642  | 29,0148  |
| R3 R2 | -6,96808 | 2,33301 | 4,22387  | 0,01332 | 0,05  | 1   | -12,65781 | -1,27835 |

Sig equals 1 indicates that the difference of the means is significant at the 0.05 level.

Sig equals 0 indicates that the difference of the means is not significant at the 0.05 level.

**Table S5.** One-way ANOVA analysis including Tukey's test for the E2P removal of reactors R1, R2 and R3 during phase I.

*Overall results of one-way ANOVA*

|       | DF | Sum of Squares | Mean Square | F Value | p-value |
|-------|----|----------------|-------------|---------|---------|
| Model | 2  | 431,74849      | 215,87425   | 6,93081 | 0,00291 |
| Error | 35 | 1090,14652     | 31,14704    |         |         |
| Total | 37 | 1521,89501     |             |         |         |

Null Hypothesis: the means of all levels are equal.

Alternative Hypothesis: The mean of one or more levels are different.

**At the 0.05 level, the population means are significantly different.**

*Results of Tukey's post hoc test*

|       | MeanDiff | SEM     | q Value | Prob    | Alpha | Sig | LCL      | UCL      |
|-------|----------|---------|---------|---------|-------|-----|----------|----------|
| R2 R1 | -2,51093 | 2,23417 | 1,5894  | 0,50606 | 0,05  | 0   | -7,97849 | 2,95662  |
| R3 R1 | 5,4679   | 2,23417 | 3,46114 | 0,04999 | 0,05  | 1   | 3,40E-04 | 10,93545 |
| R3 R2 | 7,97883  | 2,18903 | 5,15469 | 0,00242 | 0,05  | 1   | 2,62174  | 13,33592 |

Sig equals 1 indicates that the difference of the means is significant at the 0.05 level.

Sig equals 0 indicates that the difference of the means is not significant at the 0.05 level.

**Table S6.** One-way ANOVA analysis for the E2P removal of reactors R1, R2 and R3 during phase II and III.

*Overall results of one-way ANOVA*

|       | DF | Sum of Squares | Mean Square | F Value | p-value |
|-------|----|----------------|-------------|---------|---------|
| Model | 2  | 55,11708       | 27,55854    | 2,20345 | 0,12103 |
| Error | 50 | 625,34943      | 12,50699    |         |         |
| Total | 52 | 680,46651      |             |         |         |

Null Hypothesis: the means of all levels are equal.

Alternative Hypothesis: The mean of one or more levels are different.

**At the 0.05 level, the population means are not significantly different.**

**Fig. S1.** Schematic diagram of the reactor configuration.

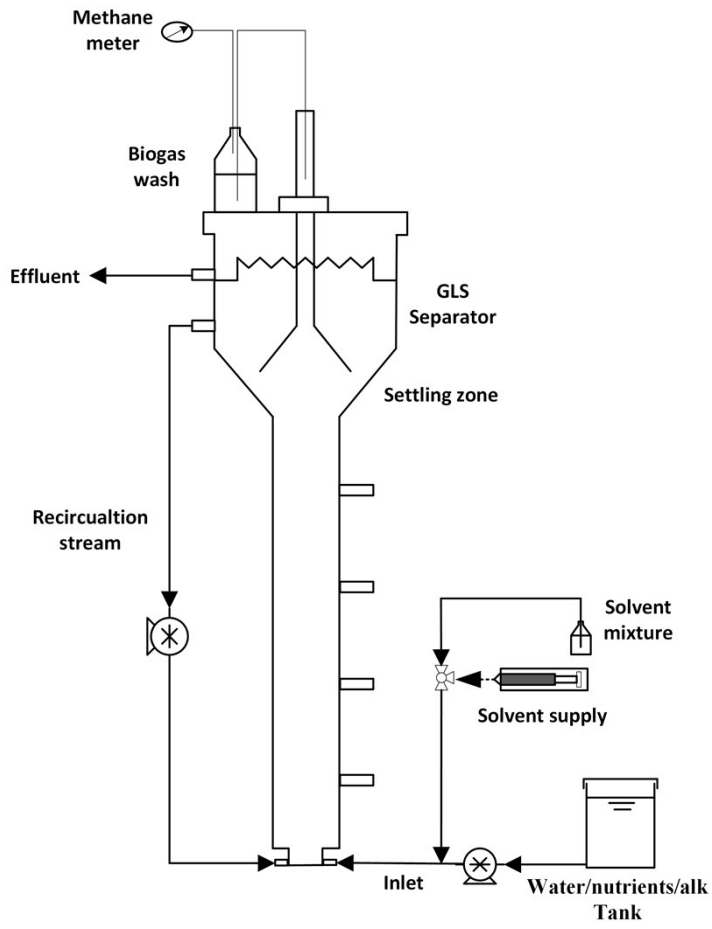

**Fig. S2.** Variation with time of the Volatile Suspended Solids (VSS) concentration of the effluent of the reactors.

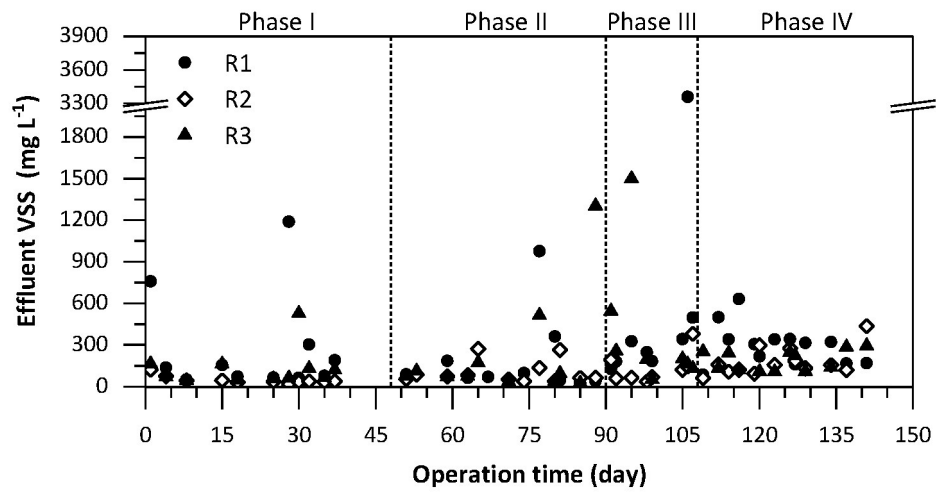



**Fig. S3.** Cumulative methane production of the UASB reactors during 106 h of intermittent operation.

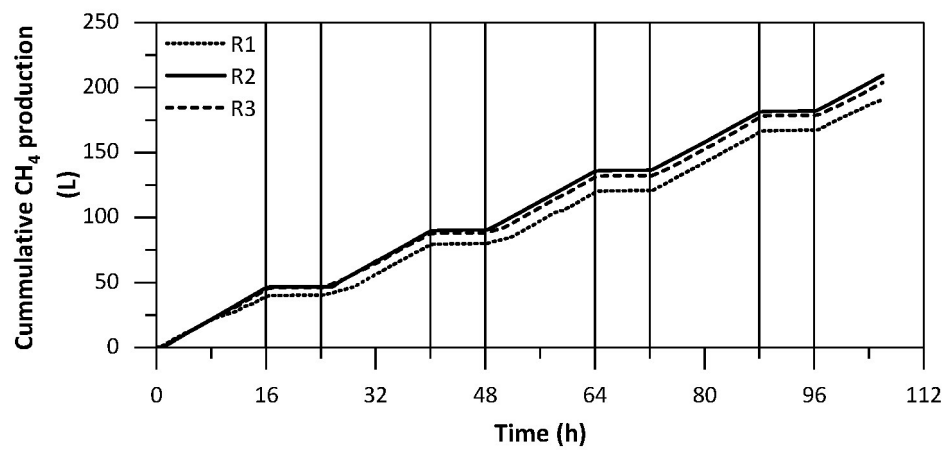

**Fig. S4.** Variation of the particle size distribution of the sludge from the reactors throughout the experiment.

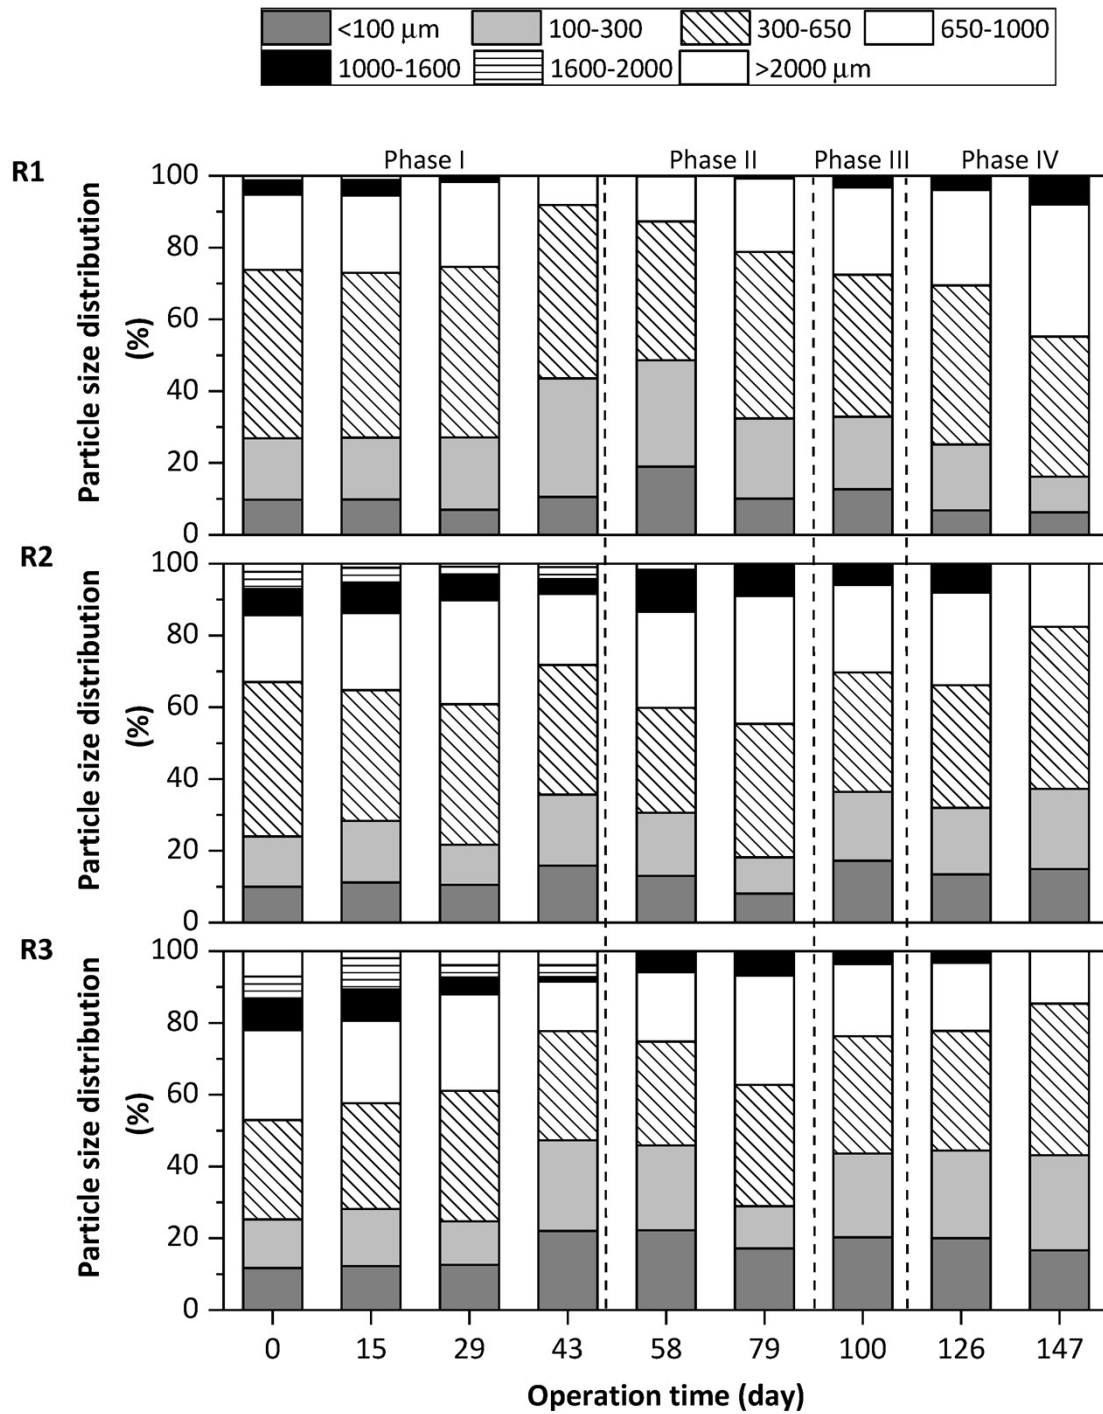

Supplement: c9ew00195f1.pdf [file c9ew00195f1.pdf]
